# Supplementary material for: Nanostructure of the deep eutectic solvent/platinum electrode interface as a function of potential and water content
Source: Royal Society of Chemistry journal article supplement (doi:10.1039/c8nh00272j), 2018-09-11
Supplement: c8nh00272j1.pdf [file c8nh00272j1.pdf]

Electronic Supporting Information

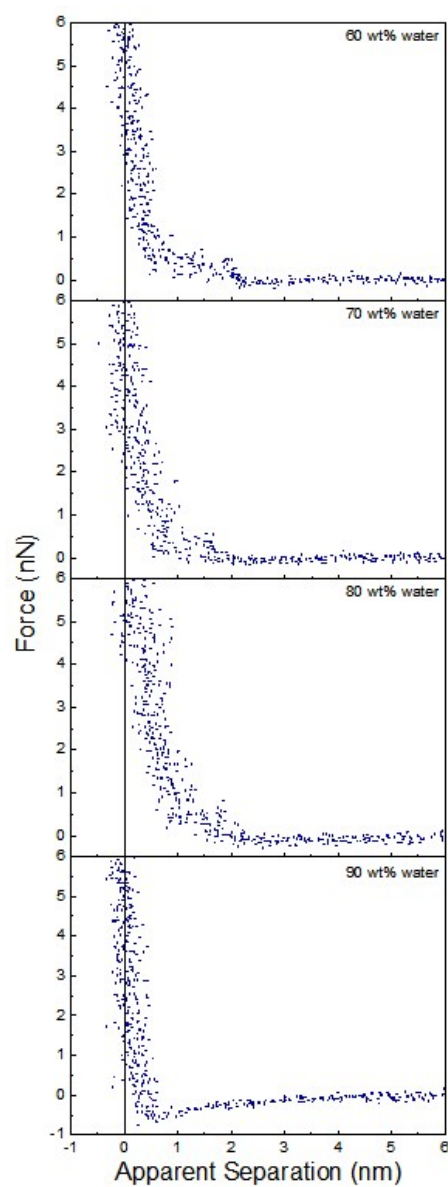

**Figure E1.** AFM Force-Distance profiles for ChCl:EG with 60, 70, 80 and 90 wt% water at OCP.
